# Supplementary material for: Effects of Temperature and pH on Recombinant Thaumatin II Production by Pichia pastoris
Source: MDPI journal article supplement (doi:10.3390/foods11101438), 2022-05-16
Supplement: s1 [file s1]

# Effects of Temperature and pH on Recombinant Thaumatin II Production by *Pichia pastoris*

Jewel Ann Joseph , Simen Akkermans and Jan F. M. Van Impe \*

BioTeC+, Chemical and Biochemical Process Technology and Control, Department of Chemical Engineering, KU Leuven, 9000 Ghent, Belgium

\*Correspondence: Jan F. M. Van Impe, [jan.vanimpe@kuleuven.be](mailto:jan.vanimpe@kuleuven.be);

| COMPONENTS                         | BSM<br>(1 L)          | FM22<br>(1 L)         | MBSM<br>(1 L)         | d'Anjou<br>(1 L)      | BMGY<br>(1 L)         | MGY<br>(1 L)          |
|------------------------------------|-----------------------|-----------------------|-----------------------|-----------------------|-----------------------|-----------------------|
| Phosphoric acid, 85 %              | 26.7 mL               | -                     | -                     | -                     | -                     | -                     |
| Calcium sulphate                   | 0.93 g                | 1.0 g                 | -                     | -                     | -                     | -                     |
| Potassium sulphate                 | 18.2 g                | 14.3 g                | -                     | -                     | -                     | -                     |
| Magnesium sulphate<br>heptahydrate | 14.9 g                | 11.7 g                | 3.2 g                 | 4.7 g                 | -                     | -                     |
| Potassium hydroxide                | 4.13 g                | -                     | -                     | -                     | -                     | -                     |
| Glycerol                           | 1.0 g                 |
| Monopotassium phosphate            | -                     | 42.9 g                | 10.0 g                | 12.0 g                | -                     | -                     |
| Calcium chloride dihydrate         | -                     | -                     | 0.35 g                | 0.36 g                | -                     | -                     |
| Ammonium sulphate                  | -                     | 5.0 g                 | -                     | 20.0 g                | -                     | -                     |
| Yeast Extract                      | -                     | -                     | -                     | -                     | 10.0 g                | -                     |
| Bacto peptone                      | -                     | -                     | -                     | -                     | 20.0 g                | -                     |
| Phosphate buffer pH 6.0            | -                     | -                     | -                     | -                     | 1.0 M                 | 1.0M                  |
| Yeast nitrogen base                | -                     | -                     | -                     | -                     | 13.4 g                | 13.4 g                |
| Biotin                             | 5 x10 <sup>-5</sup> g |
| PTM1 salts                         | 4.0 mL                | -                     | -                     | -                     | -                     | -                     |
| PTM4 salts                         | -                     | 4.0 mL                | -                     | -                     | -                     | -                     |
| Trace solution 1                   | -                     | -                     | 4.3 mL                | -                     | -                     | -                     |
| Trace solution 2                   | -                     | -                     | -                     | 1.0 mL                | -                     | -                     |

**Table S1:** Composition of the different media used for *Pichia pastoris* fermentation

| COMPONENTS                   | PTM1<br>(1 L) | PTM4<br>(1 L) | TRACE SOLUTION 1<br>(1 L) | TRACE SOLUTION 2<br>(1 L) |
|------------------------------|---------------|---------------|---------------------------|---------------------------|
| Cupric sulfate pentahydrate  | 6.0 g         | 2.0 g         | 6.0 g                     | -                         |
| Sodium iodide                | 0.08 g        | 0.08 g        | -                         | -                         |
| Manganese sulfate            | 3.0 g         | 3.0 g         | 3.0 g                     | 0.159 g                   |
| Sodium molybdate dihydrate   | 0.2 g         | 0.20 g        | 1.0 g                     | 0.071 g                   |
| Boric acid                   | 0.02 g        | 0.02 g        | 0.01 g                    | 0.026 g                   |
| Cobalt chloride              | 0.5 g         | 0.5 g         | -                         | -                         |
| Zinc chloride                | 20.0 g        | 7.0 g         | -                         | -                         |
| Ferrous sulfate heptahydrate | 65.0 g        | 22.0 g        | 65.0 g                    | -                         |
| Sulfuric acid                | 5.0 mL        | 1.0 mL        | 98.0 mL                   | -                         |
| Calcium sulfate dihydrate    | -             | 0.50 g        | -                         | 0.007 g                   |
| Zinc sulfate heptahydrate    | -             | 7.0 g         | 20.0 g                    | 0.621 g                   |
| Potassium iodide             | -             | -             | 0.42 g                    | 0.044 g                   |
| Ferric chloride hexahydrate  | -             | -             | -                         | 1.579 g                   |

**Table S2:** Composition of trace elements supplemented in different media

**Table S3:**List of chemicals and their suppliers used in the media formulation for *Pichia pastoris* fermentation.

| Component                       | Manufacturer                 |
|---------------------------------|------------------------------|
| YPD                             | Carl Roth                    |
| Bacteriological agar            | VWR chemicals                |
| Bacto peptone                   | Becton Dickinson             |
| Bacto yeast extract             | Becton Dickinson             |
| YNB                             | Carl Roth                    |
| D-glucose                       | Acros Organics               |
| Zeocin                          | Bio-Connect B.V. Netherlands |
| Glycerol                        | Chem Lab Analytical          |
| Methanol                        | VWR Chemicals                |
| Monopotassium phosphate         | Fisher Chemical              |
| Biotin                          | Sigma Aldrich                |
| Dipotassium hydrogen phosphate  | VWR Chemicals                |
| Sulfuric acid                   | Fisher Chemicals             |
| Ammonium hydroxide              | Carl Roth                    |
| Sodium chloride                 | Sigma Aldrich                |
| Chloroform                      | Sigma Aldrich                |
| Phosphoric acid (85%)           | Chem-Lab Analytical          |
| Calcium sulphate                | Sigma Aldrich                |
| Potassium sulphate              | Chem-Lab Analytical          |
| Magnesium sulphate heptahydrate | Chem-Lab Analytical          |
| Potassium hydroxide             | Fisher Chemical              |
| Ammonium sulphate               | Chem-Lab Analytical          |
| Calcium chloride dihydrate      | VWR Chemicals                |
| Ferric chloride hexahydrate     | Acros Organics               |
| Zinc sulphate heptahydrate      | VWR Chemicals                |
| Manganese sulphate monohydrate  | Merck                        |
| Potassium iodide                | Carl Roth                    |
| Boric acid                      | Acros Organics               |
| Sodium molybdate dihydrate      | Carl Roth                    |
| Cupric sulphate pentahydrate    | Merck                        |
| Sodium iodide                   | Fisher Chemicals             |
| Cobalt chloride                 | Riedel-de Haen               |
| Zinc chloride                   | Acros Organics               |
| Ferrous sulphate heptahydrate   | HoneyWell                    |
